# Supplementary material for: Nitrogen-doped tubular/porous carbon channels implanted on graphene frameworks for multiple confinement of sulfur and polysulfides
Source: Royal Society of Chemistry journal article supplement (doi:10.1039/c7ta01512g), 2017-01-01
Supplement: c7ta01512g1.pdf [file c7ta01512g1.pdf]

Electronic Supplementary Material (ESI)

**Nitrogen-doped Tubular/Porous Carbon Channels Implanted on Graphene Frameworks for Multiple Confinement of Sulfur and Polysulfides**

Mengdi Zhang, Chang Yu, Juan Yang, Changtai Zhao, Zheng Ling and Jieshan Qiu\*

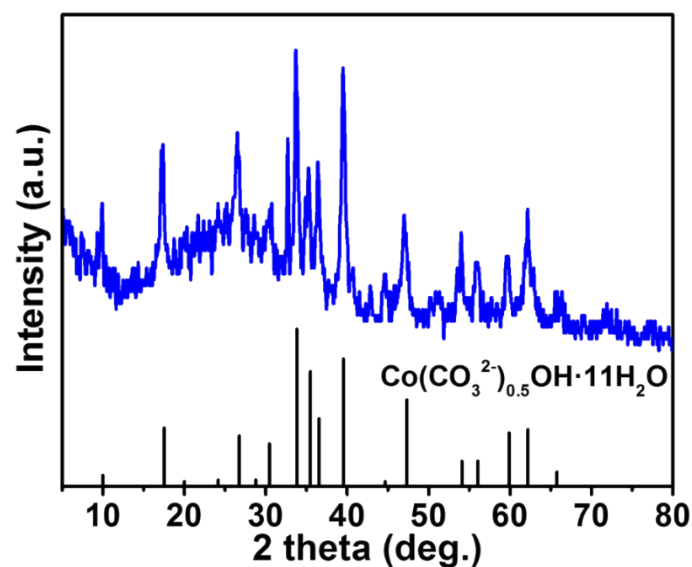

Fig. S1 XRD pattern of as-made CH-G template.

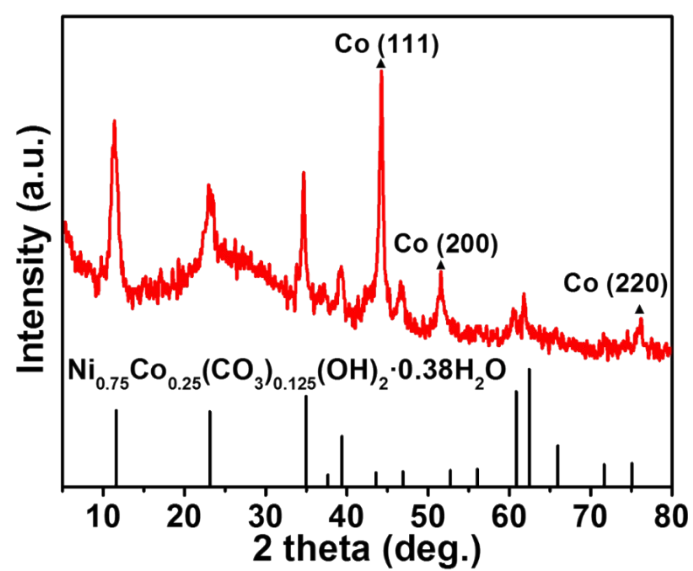

**Fig. S2** XRD pattern of the sample after thermal treatment of CH-G@PDA. It can be clearly noted that the partial Co-CH was transformed into metal cobalt, which is the main reason of the fragmentation of nanowire structure.

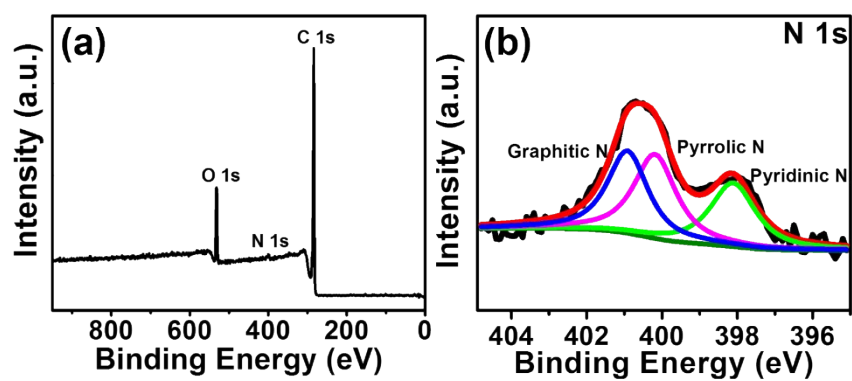

**Fig. S3** (a) XPS survey spectrum and (b) high resolution N 1s XPS spectrum for the as-made NTPC-G.

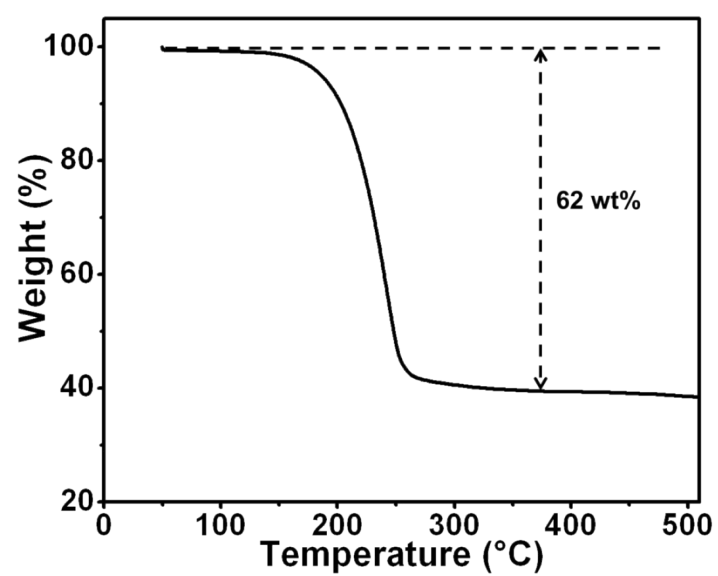

**Fig. S4** TG profile of the as-made S@NTPC-G composites.

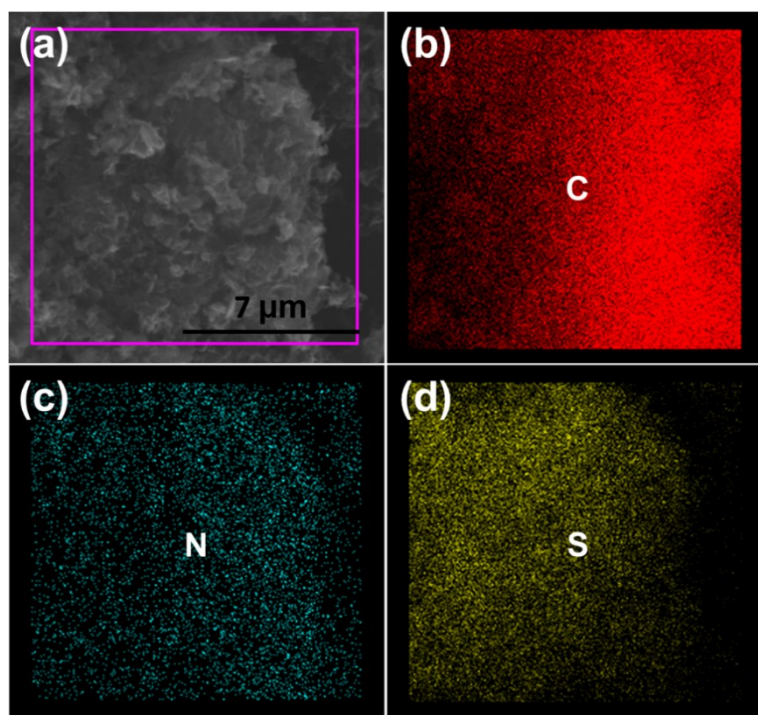

**Fig. S5** (a) SEM image and the corresponding EDX elemental mappings of (b) C, (c) N and (d) S of as-made S@NTPC-G.

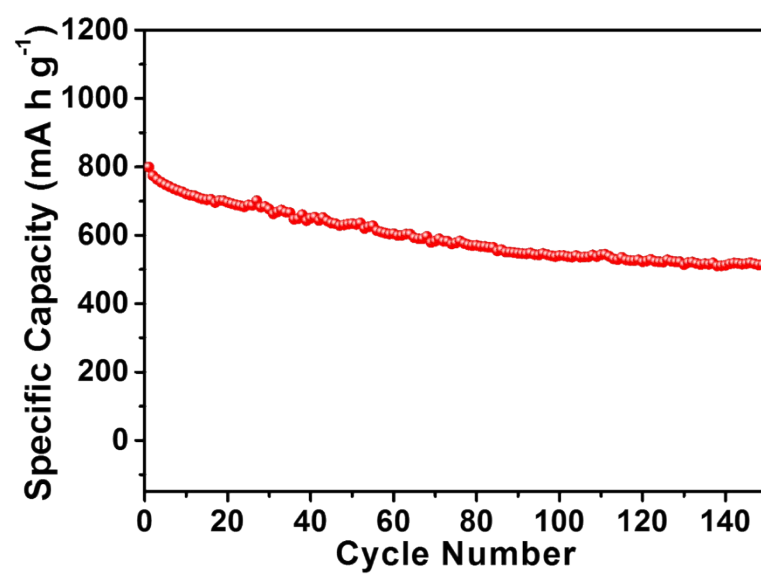

**Fig. S6** Cycling stability of S@NTPC-G cathode at a current density of 1 C.
